# Supplementary material for: Comparison of Renin&ndash;Angiotensin&ndash;Aldosterone System Inhibitors with Other Antihypertensives in Association with Coronavirus Disease-19 Clinical Outcomes: Systematic Review and Meta-Analysis
Source: Preprints.org preprint supplement (doi:10.20944/preprints202005.0392.v1), 2020-05-24
Supplement: Supplementary file 1 [file supplementary]

# I) Supplementary Tables

**Table S1: Quality score of articles (Newcastle–Ottawa Scale)**

|                       | Selection (representativeness of exposed cohort, selection of the non-exposed cohort, ascertainment of exposure, at the start of the study the outcome of interest was not present) |                                                                             |                                |                                                               | Comparability (study design and analysis, and whether any confounding variables were adjusted) | Outcome (follow-up period, cohort retention, ascertained by independent blind assessment, record linkage, or self-report) |                                                |                            |               |
|-----------------------|-------------------------------------------------------------------------------------------------------------------------------------------------------------------------------------|-----------------------------------------------------------------------------|--------------------------------|---------------------------------------------------------------|------------------------------------------------------------------------------------------------|---------------------------------------------------------------------------------------------------------------------------|------------------------------------------------|----------------------------|---------------|
| Study                 | Representativeness of Exposed Cohort (max: **)                                                                                                                                      | Selection of the Non-Exposed Cohort from Same Source as Exposed Cohort: (*) | Ascertainment of Exposure (**) | Outcome of Interest Was Not Present at Start of Study (yes=*) | Comparability of Cohorts (**)                                                                  | Assessment of Outcome (**)                                                                                                | Follow-Up Long Enough for Outcome to Occur (*) | Adequacy of Follow-Up (**) | Quality Score |
| Reynolds et al., 2020 | ★★                                                                                                                                                                                  | Yes ★                                                                       | Yes ★                          | No                                                            | Yes ★ ★                                                                                        | ★                                                                                                                         | ★                                              | ★                          | Good          |
| Yang et al., 2020     | ★                                                                                                                                                                                   | Yes ★                                                                       | Yes ★                          | No                                                            | Yes ★                                                                                          | ★                                                                                                                         | ★                                              | ★                          | Good          |
| Li et al., 2020       | ★                                                                                                                                                                                   | Yes ★                                                                       | Yes ★                          | NO                                                            | Yes ★                                                                                          | ★                                                                                                                         | ★                                              | ★                          | Good          |

|                     |    |       |       |       |         |   |   |   |      |
|---------------------|----|-------|-------|-------|---------|---|---|---|------|
| Zhang et al., 2020  | ★★ | Yes ★ | ★     | Yes ★ | Yes ★ ★ | ★ | ★ | ★ | Good |
| Guo et al., 2020    | ★  | No    | Yes★  | No ★  | No      | ★ | ★ | ★ | Poor |
| Meng et al., 2020   | ★  | Yes ★ | Yes ★ | No ★  | Yes     | ★ | ★ | ★ | Good |
| Mehra et al., 2020. | ★★ | Yes ★ | Yes ★ | No ★  | Yes ★ ★ | ★ | ★ | ★ | Good |
| Feng et al., 2020   | ★  | Yes ★ | Yes ★ | No ★  | Yes ★   | ★ | ★ | ★ | Good |

Interpretation: Good quality: 3 or 4 stars (★) in selection domain AND 1 or 2 stars in comparability domain AND 2 or 3 stars in outcome domain; Fair quality: 2 stars in selection domain AND 1 or 2 stars in comparability domain AND 2 or 3 stars in outcome/exposure domain; Poor quality: 0 or 1 star in selection domain OR 0 stars in comparability domain OR 0 or 1 stars in outcome/exposure domain.

## II) Supplementary Figures

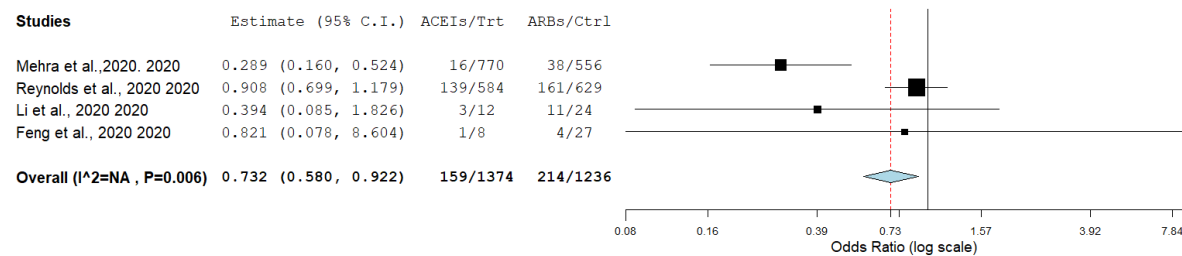

Figure S1: Risk of poor COVID-19 clinical outcome with ACEIs relative to ARBs.

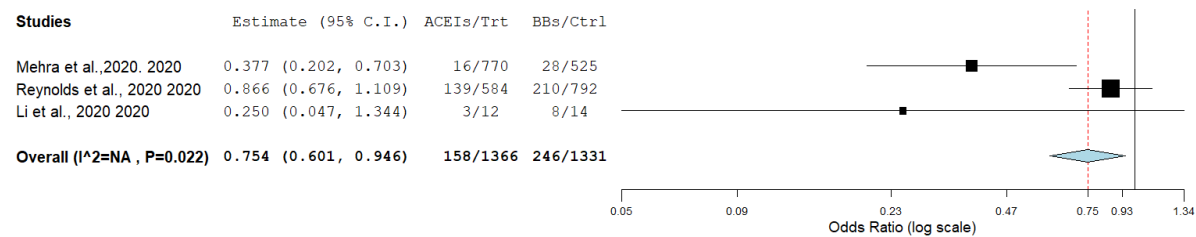

Figure S2: Risk of poor COVID-19 clinical outcome with ACEIs relative to BBs.

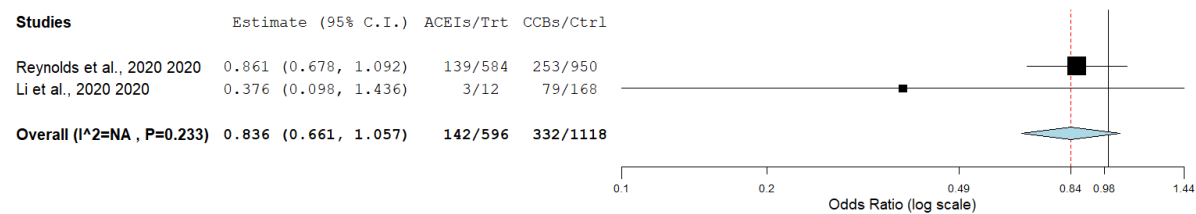

Figure S3: Risk of poor COVID-19 clinical outcome with ACEIs relative to CCBs.

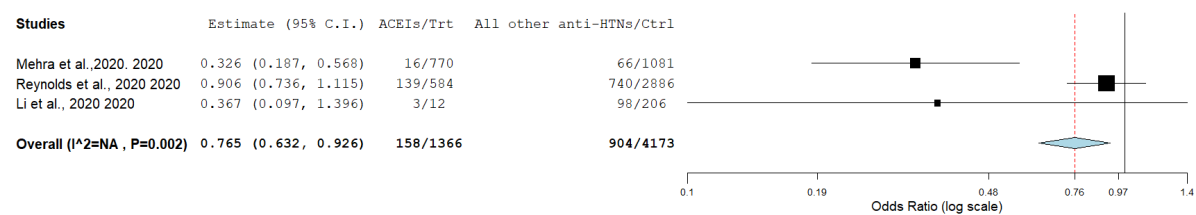

Figure S4: Risk of poor COVID-19 clinical outcome with ACEIs relative to all other antihypertensives.

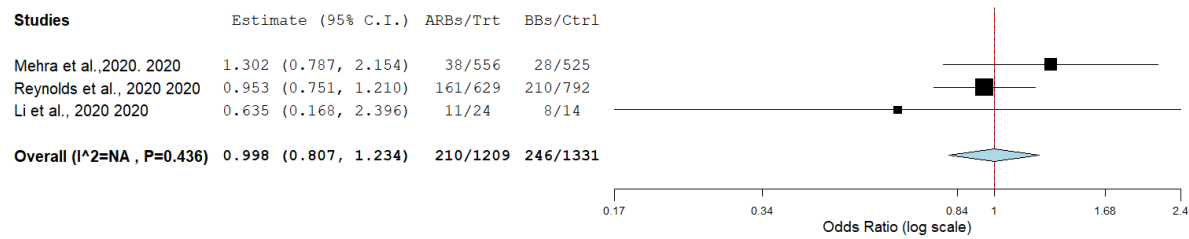

Figure S5: Risk of poor COVID-19 clinical outcome with ARBs relative to BBs.

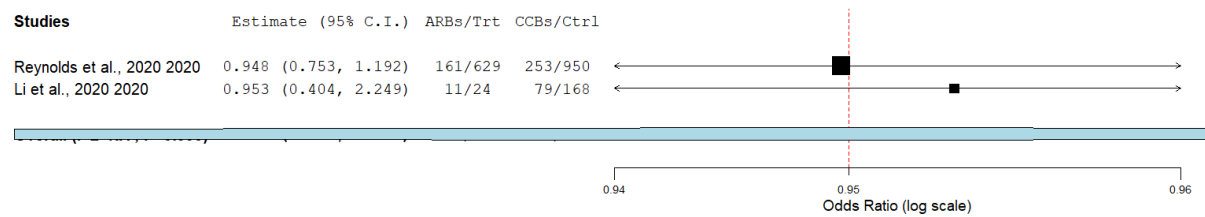

Figure S6: Risk of poor COVID-19 clinical outcome with ARBs relative to CCBs.

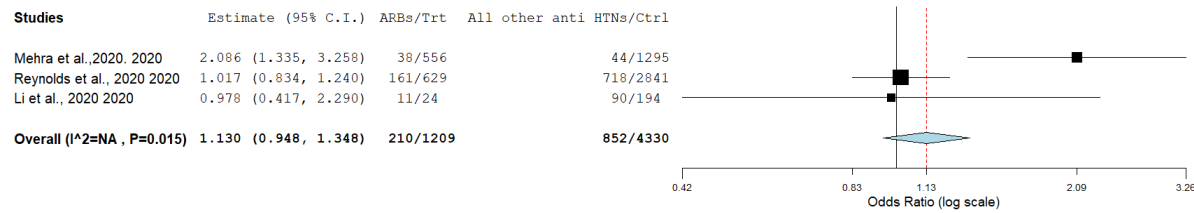

Figure S7: Risk of poor COVID-19 clinical outcome with ARBs relative to all other antihypertensives.

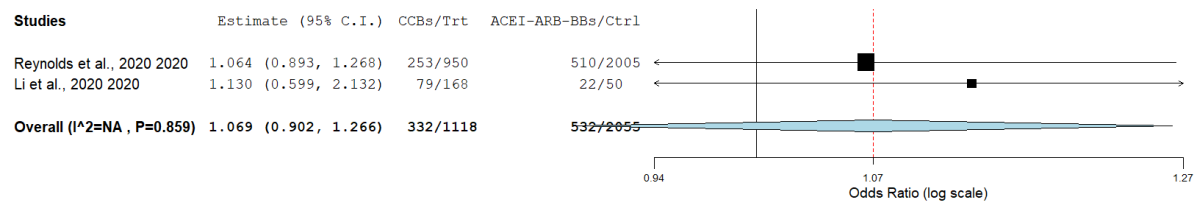

Figure S8: Risk of poor COVID-19 clinical outcome with CCBs relative to ACEI, ARBs, BBs.

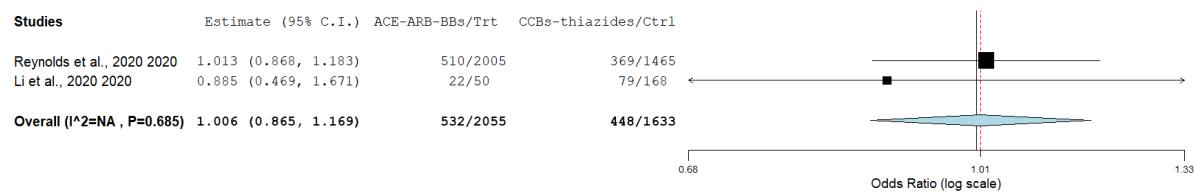

Figure S9: Risk of poor COVID-19 clinical outcome with ACEI, ARBs, BBs compared to CCBs and thiazides.

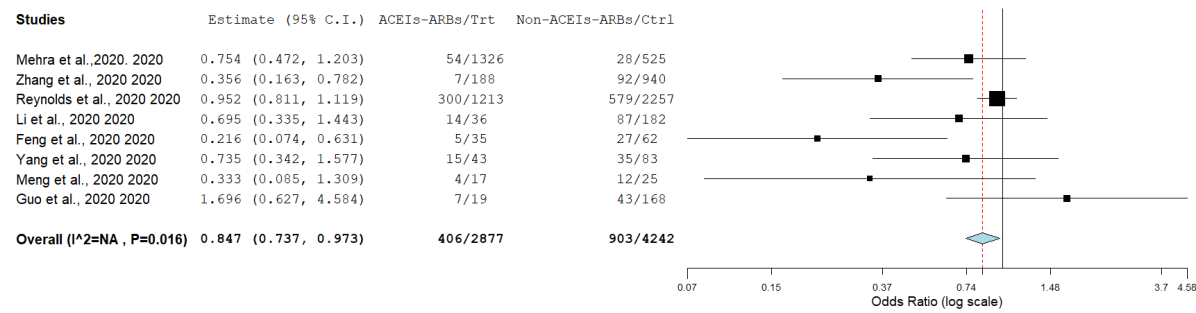

Figure S10: Risk of poor COVID-19 clinical outcome with ACEIs-ARBs compared to non- ACEIs-ARBs with Guo et al., 2020 added.
